# Supplementary material for: Data-specific substitution models improve protein-based phylogenetics
Source: PeerJ journal article supplement (doi:10.7717/peerj.15716), 2023-08-08

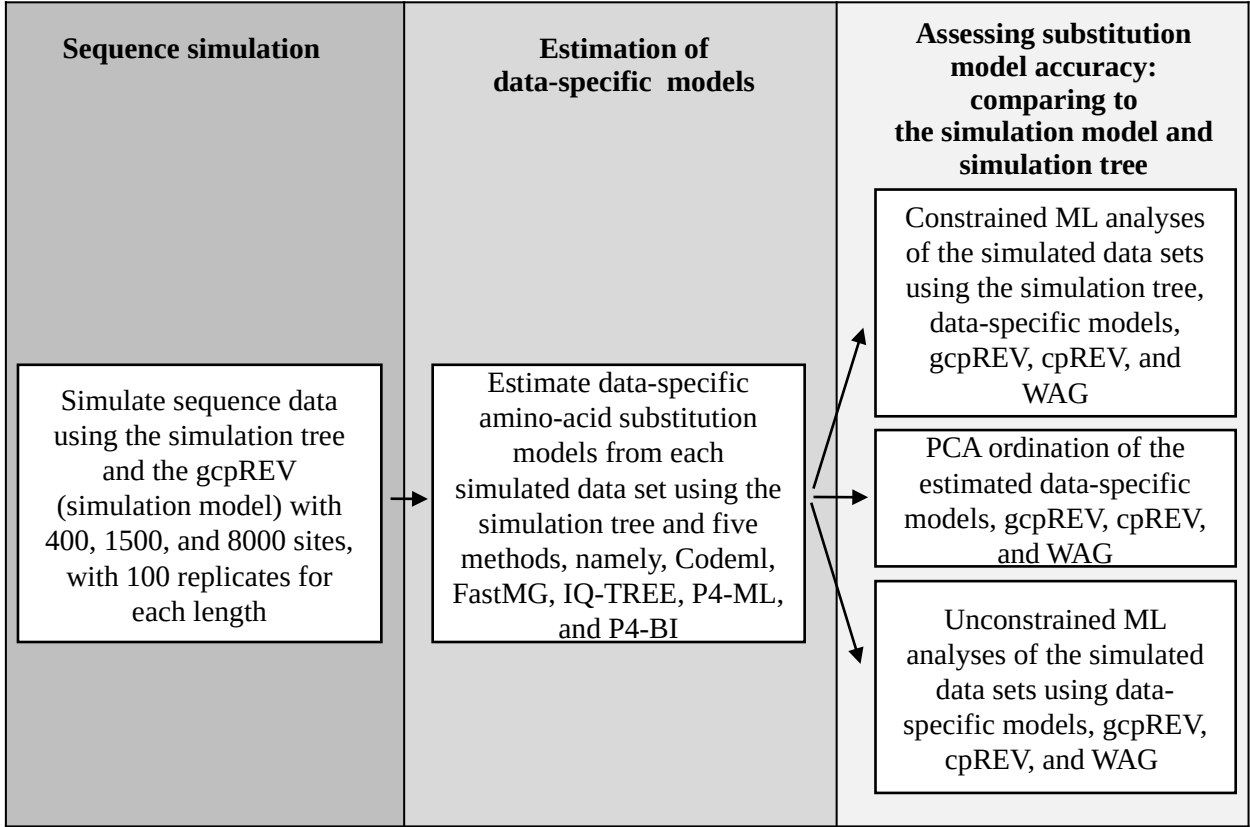

Supplement: Figure_S1.pdf [file Figure_S1.pdf]
